# Supplementary material for: Prevalence of opioid adverse events in chronic non-malignant pain: systematic review of randomised trials of oral opioids
Source: PubMed Central journal article supplement (PMC1257433; doi:10.1186/ar1782), 2005-06-28
Supplement: ar1782-S2.pdf [file ar1782-S2.pdf]

## Appendix 2: Adverse events with opioids in different pain conditions

### Adverse events with opioids in arthritis

| Adverse event                  | Number of  |          | Event rate (%) |         |       |
|--------------------------------|------------|----------|----------------|---------|-------|
|                                | Trial arms | Patients | Average        | 95% CI  | Range |
| Patients experiencing any AE   | 15         | 1187     | 54             | 51-57   | 35-87 |
| <b>Withdrawals</b>             |            |          |                |         |       |
| Adverse event withdrawal       | 24         | 2173     | 26             | 25-28   | 2-71  |
| Lack of efficacy withdrawal    | 16         | 1416     | 7.8            | 6.4-9.2 | 0-40  |
| <b>Specific adverse events</b> |            |          |                |         |       |
| Dry mouth                      | 8          | 399      | 25             | 21-29   | 3-70  |
| Nausea                         | 20         | 1864     | 24             | 22-26   | 9-98  |
| Constipation                   | 21         | 1915     | 18             | 16-20   | 2-71  |
| Dizziness                      | 18         | 1809     | 14             | 13-16   | 5-33  |
| Drowsiness or somnolence       | 13         | 1092     | 13             | 11-15   | 2-39  |
| Pruritus                       | 5          | 356      | 15             | 11-18   | 6-38  |
| Vomiting                       | 17         | 1396     | 13             | 11-15   | 2-23  |

### Adverse events with opioids in musculoskeletal pain

| Adverse event                  | Number of  |          | Event rate (%) |         |        |
|--------------------------------|------------|----------|----------------|---------|--------|
|                                | Trial arms | Patients | Average        | 95% CI  | Range  |
| Patients experiencing any AE   | 12         | 1063     | 57             | 55-61   | 8-77   |
| <b>Withdrawals</b>             |            |          |                |         |        |
| Adverse event withdrawal       | 14         | 1331     | 16             | 14-18   | 4-30   |
| Lack of efficacy withdrawal    | 7          | 631      | 5.7            | 3.9-7.5 | 0.8-20 |
| <b>Specific adverse events</b> |            |          |                |         |        |
| Dry mouth                      |            |          |                |         |        |
| Nausea                         | 16         | 1504     | 21             | 19-23   | 9-39   |
| Constipation                   | 15         | 1362     | 13             | 11-15   | 0-46   |
| Dizziness                      | 15         | 1374     | 17             | 15-19   | 8-37   |
| Drowsiness or somnolence       | 11         | 1220     | 18             | 16-20   | 7-30   |
| Pruritus                       | 4          | 157      | 26             | 19-32   | 22-28  |
| Vomiting                       | 13         | 1312     | 9.7            | 8-11    | 0-39   |

**Adverse events with opioids in neuropathic pain**

| Adverse event                  | Number of  |          | Event rate (%) |        |       |
|--------------------------------|------------|----------|----------------|--------|-------|
|                                | Trial arms | Patients | Average        | 95% CI | Range |
| Patients experiencing any AE   | 1          | 45       | 62             | 48-76  |       |
| <b>Withdrawals</b>             |            |          |                |        |       |
| Adverse event withdrawal       | 3          | 160      | 13             | 7.9-18 | 10-16 |
| Lack of efficacy withdrawal    | 2          | 115      | 7.8            | 2.9-13 | 0-14  |
| <b>Specific adverse events</b> |            |          |                |        |       |
| Dry mouth                      |            |          |                |        |       |
| Nausea                         | 3          | 160      | 19             | 13-25  | 8-24  |
| Constipation                   | 3          | 160      | 18             | 12-24  | 10-22 |
| Dizziness                      | 2          | 110      | 16             | 9.5-23 | 5-33  |
| Drowsiness or somnolence       | 3          | 160      | 19             | 13-25  | 6-42  |
| Pruritus                       | 1          | 65       | 6              | 0.3-12 |       |
| Vomiting                       | 0          | 65       | 0              |        |       |

**Adverse events with opioids in pain of mixed origin**

| Adverse event                  | Number of  |          | Event rate (%) |         |         |
|--------------------------------|------------|----------|----------------|---------|---------|
|                                | Trial arms | Patients | Average        | 95% CI  | Range   |
| Patients experiencing any AE   | 3          | 439      | 24             | 20-28   | 17-92   |
| <b>Withdrawals</b>             |            |          |                |         |         |
| Adverse event withdrawal       | 5          | 557      | 22             | 19-26   | 10-54   |
| Lack of efficacy withdrawal    | 5          | 557      | 3.9            | 2.3-5.6 | 0-6.4   |
| <b>Specific adverse events</b> |            |          |                |         |         |
| Dry mouth                      |            |          |                |         |         |
| Nausea                         | 6          | 606      | 18             | 15-24   | 4.5-54  |
| Constipation                   | 6          | 606      | 8.7            | 6.5-11  | 3.4-20  |
| Dizziness                      | 6          | 606      | 3.1            | 1.7-4.5 | 0-7.4   |
| Drowsiness or somnolence       | 6          | 606      | 5.4            | 3.6-7.3 | 0-10    |
| Pruritus                       | 4          | 216      | 4.6            | 1.8-7.4 | 1.7-7.4 |
| Vomiting                       | 5          | 557      | 5.7            | 3.8-7.7 | 1.3-19  |

Note: RCTs only, any comparator, any dose of opioid, any opioid, any combination, trials to 8 weeks.
